# Supplementary material for: Assemblage Structure of Ichthyoplankton Communities in the Southern Adriatic Sea (Eastern Mediterranean)
Source: MDPI journal article supplement (doi:10.3390/biology12111449), 2023-11-19
Supplement: s1 [file s1]

| Station | Hauls Depth Range<br>(m) | Filtered volume<br>(m <sup>3</sup> ) | BIONESS    |          | Temperature<br>(°C) | Salinity | Fluorescence<br>(Chl <i>a</i> µg l <sup>-1</sup> ) |
|---------|--------------------------|--------------------------------------|------------|----------|---------------------|----------|----------------------------------------------------|
|         |                          |                                      | Start time | End time |                     |          |                                                    |
| S1      | 90-80                    | 40.5                                 | 20:31:00   | 20:38:00 | 12.69               | 38.64    | 0.114                                              |
|         | 80-70                    | 45.3                                 | 20:38:00   | 20:45:00 | 12.68               | 38.62    | 0.151                                              |
|         | 70-60                    | 46.4                                 | 20:45:00   | 20:53:00 | 12.82               | 38.64    | 0.371                                              |
|         | 60-50                    | 47.3                                 | 20:53:00   | 21:00:00 | 12.91               | 38.64    | 0.334                                              |
|         | 50-40                    | 66                                   | 21:00:00   | 21:10:00 | 13.22               | 38.65    | 0.957                                              |
|         | 40-30                    | 38.1                                 | 21:10:00   | 21:17:00 | 13.8                | 38.72    | 0.993                                              |
|         | 30-20                    | 42.6                                 | 21:17:00   | 21:24:00 | 14.6                | 38.75    | 0.371                                              |
|         | 20-ott                   | 42.9                                 | 21:24:00   | 21:30:00 | 16.42               | 38.31    | 0.517                                              |
|         | 10-0                     | 41.2                                 | 21:30:00   | 21:37:00 | 19.74               | 37.73    | 0.041                                              |
| S3      | 170-160                  | 45.2                                 | 14:12:00   | 14:22:00 | 14.16               | 38.82    | 0.041                                              |
|         | 160-140                  | 50.2                                 | 14:22:00   | 14:32:00 | 14.97               | 38.93    | 0.041                                              |
|         | 140-120                  | 50.4                                 | 14:32:00   | 14:42:00 | 14.99               | 38.93    | 0.114                                              |
|         | 120-100                  | 54.1                                 | 14:42:00   | 14:54:00 | 15.05               | 38.93    | 0.224                                              |
|         | 100-80                   | 66.3                                 | 14:54:00   | 15:04:00 | 15.19               | 38.93    | 0.371                                              |
|         | 80-60                    | 59                                   | 15:04:00   | 15:14:00 | 15.35               | 38.93    | 0.59                                               |
|         | 60-40                    | 61.6                                 | 15:14:00   | 15:25:00 | 15.75               | 38.92    | 0.151                                              |
|         | 40-20                    | 50.9                                 | 15:25:00   | 15:34:00 | 16.85               | 38.9     | 0.041                                              |
| L41     | 550-400                  | 82.1                                 | 18:38:00   | 18:56:00 | 13.58               | 38.74    | 0.004                                              |
|         | 400-300                  | 50.5                                 | 18:56:00   | 19:10:00 | 13.67               | 38.76    | 0.004                                              |
|         | 300-200                  | 69.7                                 | 19:10:00   | 19:22:00 | 13.76               | 38.78    | 0.004                                              |
|         | 200-100                  | 56.6                                 | 19:22:00   | 19:32:00 | 14.16               | 38.79    | 0.261                                              |
|         | 100-80                   | 66.3                                 | 19:32:00   | 19:45:00 | 14.68               | 38.82    | 0.371                                              |
|         | 80-60                    | 52.2                                 | 19:45:00   | 19:54:00 | 14.94               | 38.8     | 0.334                                              |
|         | 60-40                    | 45.1                                 | 19:54:00   | 20:03:00 | 15.68               | 38.79    | 0.114                                              |
|         | 40-20                    | 45.7                                 | 20:03:00   | 20:11:00 | 17.4                | 38.8     | 0.078                                              |
|         | 0-20                     | 58.3                                 | 20:11:00   | 20:21:00 | 19.54               | 38.74    | 0.114                                              |
| S7      | 180-160                  | 40.6                                 | 15:37:00   | 15:47:00 | 15.02               | 38.94    | 0.004                                              |

|     |         |      |          |          |       |       |       |
|-----|---------|------|----------|----------|-------|-------|-------|
| S20 | 160-140 | 29   | 15:47:00 | 15:54:00 | 15.08 | 38.94 | 0.187 |
|     | 140-120 | 34.6 | 15:54:00 | 16:02:00 | 15.12 | 38.94 | 0.334 |
|     | 120-100 | 30.1 | 16:02:00 | 16:09:00 | 15.18 | 38.93 | 0.48  |
|     | 100-80  | 26.5 | 16:09:00 | 16:15:00 | 15.29 | 38.93 | 0.59  |
|     | 80-60   | 35.9 | 16:15:00 | 16:23:00 | 15.48 | 38.91 | 0.407 |
|     | 60-40   | 35.7 | 16:23:00 | 16:30:00 | 16.03 | 38.93 | 0.151 |
|     | 40-20   | 44   | 16:30:00 | 16:38:00 | 17.23 | 38.89 | 0.078 |
|     | 20-0    | 40   | 16:38:00 | 16:46:00 | 21.16 | 36.63 | 0.078 |
|     | 700-600 | 27   | 15:09:00 | 15:18:00 | 13.75 | 38.77 | 0.004 |
|     | 600-400 | 59.1 | 15:18:00 | 15:30:00 | 13.97 | 38.8  | 0.004 |
| S21 | 400-300 | 65.3 | 15:30:00 | 15:44:00 | 14.1  | 38.83 | 0.004 |
|     | 300-200 | 45.9 | 15:44:00 | 15:53:00 | 14.54 | 38.91 | 0.004 |
|     | 200-100 | 52.2 | 15:53:00 | 16:05:00 | 14.92 | 38.91 | 0.334 |
|     | 100-80  | 35.2 | 16:05:00 | 16:14:00 | 15.04 | 38.91 | 0.59  |
|     | 80-60   | 34.3 | 16:14:00 | 16:22:00 | 15.24 | 38.87 | 0.81  |
|     | 60-40   | 29.3 | 16:22:00 | 16:30:00 | 15.66 | 38.87 | 0.261 |
|     | 40-0    | 43   | 16:30:00 | 16:41:00 | 19.1  | 38.83 | 0.041 |
|     | 900-800 | 30.2 | 22:43:00 | 22:56:00 | 13.8  | 38.77 | 0.004 |
|     | 800-600 | 55.1 | 22:56:00 | 23:12:00 | 14.08 | 38.84 | 0.004 |
|     | 600-400 | 45.2 | 23:12:00 | 23:24:00 | 14.58 | 38.93 | 0.004 |
| S22 | 400-100 | 65.2 | 23:24:00 | 23:44:00 | 15.49 | 38.98 | 0.078 |
|     | 100-80  | 25.6 | 23:44:00 | 23:55:00 | 15.53 | 38.99 | 0.261 |
|     | 80-60   | 26.7 | 23:55:00 | 00:05:00 | 15.51 | 38.96 | 0.59  |
|     | 60-40   | 27.8 | 00:05:00 | 00:15:00 | 15.83 | 38.93 | 0.187 |
|     | 40-0    | 29   | 00:15:00 | 00:28:00 | 17.61 | 38.85 | 0.114 |
|     | 800-900 | 15.1 | 18:35:00 | 18:43:00 | 13.96 | 38.8  | 0.004 |
|     | 600-800 | 65.1 | 18:43:00 | 19:01:00 | 14.2  | 38.85 | 0.004 |
|     | 600-400 | 50.9 | 19:01:00 | 19:14:00 | 14.73 | 38.93 | 0.004 |
|     | 200-400 | 46.1 | 19:14:00 | 19:24:00 | 15.08 | 38.93 | 0.004 |
|     | 100-200 | 37.2 | 19:24:00 | 19:38:00 | 15.4  | 38.97 | 0.151 |
|     | 80-100  | 24.7 | 19:38:00 | 19:48:00 | 15.45 | 38.97 | 0.444 |

|     |          |      |          |          |       |       |       |
|-----|----------|------|----------|----------|-------|-------|-------|
| S23 | 60-80    | 25.4 | 19:48:00 | 19:59:00 | 15.42 | 38.93 | 0.92  |
|     | 40-60    | 31.5 | 19:59:00 | 20:10:00 | 15.68 | 38.93 | 0.224 |
|     | 0-40     | 49.6 | 20:10:00 | 20:25:00 | 16.85 | 38.83 | 0.114 |
|     | 1100-800 | 90.4 | 18:34:00 | 18:53:00 | 13.95 | 38.81 | 0.004 |
|     | 800-600  | 76.6 | 18:53:00 | 19:06:00 | 14.33 | 38.9  | 0.004 |
|     | 600-400  | 94   | 19:06:00 | 19:22:00 | 14.81 | 38.99 | 0.004 |
|     | 400-200  | 93.5 | 19:22:00 | 19:37:00 | 14.99 | 38.93 | 0.004 |
|     | 200-100  | 48   | 19:37:00 | 19:47:00 | 15.27 | 38.96 | 0.041 |
|     | 100-80   | 57.4 | 19:47:00 | 19:57:00 | 15.42 | 38.93 | 0.59  |
|     | 80-60    | 45.1 | 19:57:00 | 20:07:00 | 15.75 | 38.94 | 0.407 |
| S24 | 60-40    | 47.2 | 20:07:00 | 20:17:00 | 16.1  | 38.92 | 0.114 |
|     | 40-0     | 55.1 | 20:17:00 | 20:29:00 | 18.35 | 38.87 | 0.078 |
|     | 1000-800 | 53.3 | 22:39:00 | 22:54:00 | 13.81 | 38.77 | 0.004 |
|     | 800-600  | 65.8 | 22:54:00 | 23:07:00 | 14.07 | 38.84 | 0.004 |
|     | 600-400  | 83.1 | 23:07:00 | 23:22:00 | 14.47 | 38.92 | 0.004 |
|     | 400-200  | 74.9 | 23:22:00 | 23:34:00 | 14.77 | 38.94 | 0.004 |
|     | 200-100  | 40.9 | 23:34:00 | 23:41:00 | 14.92 | 38.91 | 0.517 |
|     | 100-80   | 45.8 | 23:41:00 | 23:50:00 | 15.09 | 38.91 | 0.883 |
|     | 80-60    | 49.2 | 23:50:00 | 00:00:00 | 15.49 | 38.91 | 0.371 |
|     | 60-40    | 51.3 | 00:00:00 | 00:10:00 | 16.27 | 38.91 | 0.151 |
| S25 | 40-0     | 89.1 | 00:10:00 | 00:23:00 | 19.31 | 38.83 | 0.078 |
|     | 210-180  | 33.9 | 04:36:00 | 04:46:00 | 14.34 | 38.84 | 0.114 |
|     | 180-160  | 19.5 | 04:46:00 | 04:52:00 | 14.33 | 38.84 | 0.114 |
|     | 160-140  | 31.6 | 04:52:00 | 05:00:00 | 14.34 | 38.84 | 0.187 |
|     | 140-100  | 62.2 | 05:00:00 | 05:17:00 | 14.55 | 38.85 | 0.444 |
|     | 100-80   | 32.5 | 05:17:00 | 05:25:00 | 14.67 | 38.84 | 0.664 |
|     | 80-60    | 34.5 | 05:25:00 | 05:35:00 | 15.07 | 38.8  | 0.48  |
|     | 60-40    | 35.4 | 05:35:00 | 05:44:00 | 16.04 | 38.98 | 0.151 |
|     | 40-0     | 107  | 05:44:00 | 05:59:00 | 17.92 | 39.44 | 0.004 |
| S8  | 310-250  | 69   | 04:59:00 | 05:16:00 | 14.93 | 38.94 | 0.004 |
|     | 250-200  | 64.9 | 05:16:00 | 05:30:00 | 15.07 | 38.94 | 0.004 |

|      |          |       |          |          |       |       |       |
|------|----------|-------|----------|----------|-------|-------|-------|
| S10  | 200-150  | 43.9  | 05:30:00 | 05:40:00 | 15.14 | 38.93 | 0.004 |
|      | 150-100  | 59.2  | 05:40:00 | 05:52:00 | 15.15 | 38.92 | 0.078 |
|      | 100-80   | 38.5  | 05:52:00 | 06:00:00 | 15.23 | 38.93 | 0.297 |
|      | 80-60    | 36.5  | 06:00:00 | 06:07:00 | 15.39 | 38.93 | 1.36  |
|      | 60-40    | 37.4  | 06:07:00 | 06:15:00 | 15.8  | 38.91 | 0.151 |
|      | 40-20    | 30.3  | 06:15:00 | 06:22:00 | 16.82 | 38.92 | 0.151 |
|      | 20-0     | 29.3  | 06:22:00 | 06:35:00 | 20.21 | 38.73 | 0.151 |
|      | 1096-800 | 77.3  | 00:26:00 | 00:41:00 | 13.63 | 38.77 | 0.004 |
|      | 800-600  | 72.5  | 00:41:00 | 00:53:00 | 13.9  | 38.79 | 0.004 |
|      | 600-400  | 79.6  | 00:53:00 | 01:05:00 | 13.98 | 38.81 | 0.004 |
| S15  | 400-200  | 89.1  | 01:05:00 | 01:20:00 | 13.98 | 38.82 | 0.004 |
|      | 200-100  | 68.7  | 01:20:00 | 01:34:00 | 13.99 | 38.82 | 0.444 |
|      | 100-80   | 38.8  | 01:34:00 | 01:42:00 | 14.16 | 38.83 | 0.664 |
|      | 80-60    | 45.6  | 01:42:00 | 01:51:00 | 14.3  | 38.83 | 0.883 |
|      | 60-40    | 38.7  | 01:51:00 | 01:58:00 | 14.63 | 38.82 | 0.151 |
|      | 40-0     | 39.9  | 01:58:00 | 02:07:00 | 20.16 | 38.8  | 0.078 |
|      | 900-800  | 24.9  | 06:01:00 | 06:09:00 | 13.37 | 38.74 | 0.004 |
|      | 800-600  | 105.4 | 06:09:00 | 06:28:00 | 13.62 | 38.76 | 0.004 |
|      | 400-200  | 74.6  | 06:28:00 | 06:44:00 | 13.97 | 38.81 | 0.004 |
|      | 200-100  | 49    | 06:53:00 | 07:01:00 | 14.59 | 38.88 | 0.151 |
| S16c | 100-80   | 60.7  | 07:01:00 | 07:11:00 | 14.57 | 38.85 | 0.334 |
|      | 80-60    | 47.5  | 07:11:00 | 07:19:00 | 14.92 | 38.83 | 0.334 |
|      | 60-40    | 47    | 07:19:00 | 07:28:00 | 15.73 | 38.89 | 0.224 |
|      | 40-0     | 57.1  | 07:28:00 | 07:38:00 | 19.42 | 38.71 | 0.004 |
|      | 300-250  | 30,75 | 11:58:00 | 12:05:00 | 14.8  | 38.93 | 0.004 |
|      | 250-200  | 59,63 | 12:05:00 | 12:16:00 | 14.92 | 38.94 | 0.004 |
|      | 200-150  | 48,00 | 12:16:00 | 12:24:00 | 14.94 | 38.92 | 0.004 |
|      | 150-100  | 40,42 | 12:24:00 | 12:40:00 | 15.12 | 38.93 | 0.151 |
|      | 100-80   | 40,24 | 12:40:00 | 12:47:00 | 15.14 | 38.92 | 0.517 |
|      | 80-60    | 35,98 | 12:47:00 | 12:55:00 | 15.48 | 38.93 | 0.627 |
|      | 60-40    | 29,86 | 12:55:00 | 12:55:00 | 15.79 | 38.92 | 0.151 |

|     |          |       |          |          |       |       |       |
|-----|----------|-------|----------|----------|-------|-------|-------|
| S19 | 0-40     | 35,72 | 12:55:00 | 13:00:00 | 20.49 | 38.66 | 0.041 |
|     | 100-90   | 48.1  | 10:23:00 | 10:34:00 | 14.68 | 38.88 | 0.261 |
|     | 90-80    | 42.4  | 10:34:00 | 10:42:00 | 14.72 | 38.88 | 0.297 |
|     | 80-70    | 49.3  | 10:42:00 | 10:51:00 | 14.83 | 38.89 | 0.444 |
|     | 40-30    | 67.2  | 10:51:00 | 11:14:00 | 15.79 | 38.84 | 0.224 |
|     | 30-20    | 48.3  | 11:14:00 | 11:23:00 | 18.76 | 38.42 | 0.297 |
|     | 20-ott   | 25.8  | 11:23:00 | 11:31:00 | 18.97 | 38.21 | 0.114 |
| S14 | 10-0     | 32.7  | 11:31:00 | 11:42:00 | 19.08 | 38.17 | 0.032 |
|     | 600-400  | 57.8  | 18:18:00 | 18:33:00 | 13.91 | 38.8  | 0.004 |
|     | 400-300  | 57.9  | 18:33:00 | 18:44:00 | 13.97 | 38.81 | 0.004 |
|     | 300-200  | 60.4  | 18:44:00 | 18:56:00 | 13.94 | 38.78 | 0.078 |
|     | 200-100  | 45.9  | 18:56:00 | 19:05:00 | 14.69 | 38.88 | 0.261 |
|     | 100-80   | 34.8  | 19:05:00 | 19:14:00 | 14.92 | 38.91 | 0.517 |
|     | 80-60    | 34.7  | 19:14:00 | 19:22:00 | 15.06 | 38.92 | 0.627 |
| S11 | 60-40    | 32.6  | 19:22:00 | 19:31:00 | 15.29 | 38.89 | 0.371 |
|     | 40-20    | 49.2  | 19:31:00 | 19:41:00 | 18.25 | 38.76 | 0.151 |
|     | 20-0     | 46.3  | 19:41:00 | 18:51:00 | 18.88 | 38.54 | 0.224 |
|     | 1060-800 | 47.8  | 07:45:00 | 07:56:00 | 13.39 | 38.72 | 0.004 |
|     | 800-600  | 79.9  | 07:56:00 | 08:09:00 | 13.74 | 38.76 | 0.004 |
|     | 600-400  | 90.2  | 08:09:00 | 08:24:00 | 13.97 | 38.81 | 0.004 |
|     | 400-200  | 92.3  | 08:24:00 | 08:36:00 | 13.98 | 38.81 | 0.004 |
|     | 200-100  | 62.2  | 08:36:00 | 08:46:00 | 14    | 38.82 | 0.114 |
|     | 100-80   | 63.3  | 08:46:00 | 08:56:00 | 14.05 | 38.82 | 0.737 |
|     | 80-60    | 63.7  | 08:56:00 | 09:06:00 | 14.28 | 38.82 | 0.517 |
|     | 60-40    | 58.2  | 09:06:00 | 09:15:00 | 14.64 | 38.82 | 0.187 |
|     | 40-0     | 94.7  | 09:15:00 | 09:25:00 | 18.41 | 38.8  | 0.032 |

**Table S1** Sampled strata for each station along with filtered volume, time sampling, temperature, salinity and fluorescence values
